# Supplementary material for: Adults With Mild‐to‐Moderate Congenital Heart Disease Demonstrate Measurable Neurocognitive Deficits
Source: PubMed Central journal article supplement — J Am Heart Assoc. 2020 Sep 28;9(19):e015379. doi: 10.1161/JAHA.119.015379 (PMC7792385; doi:10.1161/jaha.119.015379), 2020-09-28
Supplement: JAH3-9-e015379-s001.pdf [file JAH3-9-e015379-s001.pdf]

# **Supplemental Material**

**Table S1. Illness Definitions by HES and Self-Reported Data in the UKB.**

| Diagnosis                                                                                                                                                                                                          | ICD 9                                       | ICD 10                                                     | Self-reported Medical History | Self-reported Operative History |
|--------------------------------------------------------------------------------------------------------------------------------------------------------------------------------------------------------------------|---------------------------------------------|------------------------------------------------------------|-------------------------------|---------------------------------|
| Mood disorders (depression, anxiety, panic attacks, suicidality, mania, bipolar disorders)                                                                                                                         | 296*, 300*, 311*                            | F25*, F30*, F31*, F32*, F33*, F34*, F38*, F39*, F40*, F41* | 1286, 1287, 1288, 1290, 1291  |                                 |
| Dementia & degenerative disorders (Alzheimer's disease, vascular dementia, other degenerative neurologic conditions)                                                                                               | 331*, 290*, 294.1                           | F00*, F01*, F02*, F03*, G30*, G31*                         | 1263                          |                                 |
| Parkinson's Disease                                                                                                                                                                                                | 332*                                        | G20*                                                       | 1262                          |                                 |
| Intellectual disability (organic brain damage, developmental delays, mental retardation)                                                                                                                           | 310*, 315*, 317*, 318*, 319*                | F04*, F06.7, F10.6, F70*, F71*, F72*, F73*, F78*, F79*     |                               |                                 |
| Seizure disorders (epilepsy)                                                                                                                                                                                       | 345*                                        | G40*, G41*                                                 | 1264                          |                                 |
| Ischemic or Hemorrhagic Stroke                                                                                                                                                                                     | 430*, 431*, 432*, 433*, 434*, 435*, 436*    | I60*, I61*, I62*, I63*, G45*, I64*, G46*                   | 1491, 1583, 1081, 1082        |                                 |
| Coronary Artery Disease (CAD) (history of unstable angina, myocardial infarction, chronic ischemic heart disease, prior percutaneous coronary interventions, and/or prior coronary artery bypass graft procedures) | 410*, 411*, 412*, 413*, 414.0, 414.8, 414.9 | I20*, I21*, I22*, I24.0, I24.8, I24.9, I25*                | 1074, 1075                    | 1070, 1095, 1523                |

\*Inclusive of diagnostic codes with trailing digits.

ICD 9 = International Classification of Diseases, 9<sup>th</sup> revision; ICD 10 = International Classification of Diseases, 10<sup>th</sup> revision; HES = Hospital encounter statistics; UKB = UK Biobank; CAD = Coronary artery disease;

**Table S2. ACHD subgroups by lesion type (reproduced from Saha et al., Circulation 2019) Lesion types.**

|                                                                              | No. (%)          |
|------------------------------------------------------------------------------|------------------|
| <b>Complex defects</b>                                                       | <b>96 (100)</b>  |
| Single ventricle, truncus arteriosus, TOF, TGA, TAPVR, AVCD                  | 50 (52)          |
| Unspecified cyanotic lesion                                                  | 45 (48)          |
| <b>Non-complex defects</b>                                                   | <b>924 (100)</b> |
| Left-to-right shunt only (ASD, VSD, AP window, PDA, PAPVR)                   | 448 (48)         |
| Left sided lesion only                                                       | 90 (10)          |
| Right sided lesion only                                                      | 47 (5)           |
| Mixed shunt, left-sided, and/or right-sided lesion                           | 50 (5)           |
| Heart surgery prior to age 18                                                | 185 (20)         |
| Non-specific ICD code for congenital heart disease                           | 71 (8)           |
| Other (coronary artery malformation, venous malformation, conduction defect) | 33 (4)           |

ACHD = adult congenital heart disease; ASD = atrial septal defect; AP = aorto-pulmonary; AVCD = atrioventricular canal defect; ICD = International Classification of Diseases; PAPVR = partial anomalous pulmonary venous return; PDA = patent ductus arteriosus; TAPVR = total anomalous pulmonary venous return; TGA = transposition of the great arteries; TOF = tetralogy of Fallot; VSD = ventricular septal defect

**Table S3. Demographic characteristics of ACHD participants ACHD complexity in the UK Biobank.**

|                                                   | Mild to moderate ACHD | Complex ACHD        | p-value      |
|---------------------------------------------------|-----------------------|---------------------|--------------|
| <b>n</b>                                          | 924                   | 96                  |              |
| <b>Demographic Factors</b>                        |                       |                     |              |
| Age at Enrollment (median, [IQR])                 | 57 [49, 63]           | 58 [49, 64]         | 0.236        |
| Male Sex (%)                                      | 428 (46.3)            | 54 (56.2)           | 0.081        |
| Year of Birth (median [IQR])                      | 1951 [1946, 1959]     | 1951 [1944, 1958]   | 0.243        |
| Caucasian Ethnicity (%)                           | 876 (94.8)            | 88 (91.7)           | 0.294        |
| Townsend (median [IQR])                           | -1.92 [-3.44, 1.23]   | -0.99 [-3.02, 1.86] | 0.106        |
| Smoking (%)                                       |                       |                     | 0.485        |
| Never                                             | 514 (55.9)            | 48 (50.0)           |              |
| Current                                           | 90 (9.8)              | 12 (12.5)           |              |
| Previous                                          | 315 (34.3)            | 36 (37.5)           |              |
| Alcohol (%)                                       |                       |                     | 0.301        |
| Seldom                                            | 344 (37.4)            | 38 (40.0)           |              |
| Daily                                             | 168 (18.2)            | 22 (23.2)           |              |
| Weekly                                            | 409 (44.4)            | 35 (36.8)           |              |
| Obese (%)                                         | 241 (26.4)            | 13 (13.7)           | <b>0.010</b> |
| Systolic blood pressure (median, IQR)             | 134 [121, 147]        | 134 [118, 146]      | 0.302        |
| Diastolic blood pressure (median [IQR])           | 79 [73, 87]           | 78 [71, 89]         | 0.470        |
| Positive family history of cognitive disorder (%) | 221 (24.6)            | 16 (18.0)           | 0.205        |
| <b>Quality of Life Measures</b>                   |                       |                     |              |
| Achieved college graduation (%)                   | 278 (30.4)            | 30 (31.9)           | 0.855        |
| Unemployed (%)                                    | 107 (11.6)            | 17 (17.7)           | 0.113        |
| Hours worked per week (median [IQR])              | 37 [25, 41]           | 39 [28, 44]         | 0.317        |
| Lives with a partner/spouse (%)                   | 662 (88.3)            | 64 (90.1)           | 0.781        |
| <b>Comorbid Illness</b>                           |                       |                     |              |
| Dementia (%)                                      | 0 (0)                 | 0 (0)               | NA           |
| Parkinsons (%)                                    | 1 (0.1)               | 0 (0)               | 1.000        |
| Intellectual delay (%)                            | 0 (0)                 | 0 (0)               | NA           |
| Mood disorder (%)                                 | 71 (7.9)              | 6 (6.4)             | 0.760        |
| Seizure disorder (%)                              | 16 (1.7)              | 0 (0)               | 0.384        |
| Ischemic or hemorrhagic stroke (%)                | 82 (9.0)              | 7 (7.6)             | 0.796        |
| Coronary artery disease (%)                       | 171 (19.1)            | 14 (14.6)           | 0.346        |

ACHD = Adult congenital heart disease; IQR = interquartile range

**Table S4. Neurocognitive performance among ACHD and non-ACHD after exclusion of complex ACHD diagnoses.**

|                                             | Least Squares Mean (95% CI) |                      | p-value*     |
|---------------------------------------------|-----------------------------|----------------------|--------------|
|                                             | Non-ACHD                    | ACHD                 |              |
| <b>Neurocognitive testing (n)</b>           | 497,983                     | 924                  |              |
| Completed at Enrollment                     |                             |                      |              |
|                                             | 492,245                     | 914                  |              |
| Reaction time, milliseconds                 | 558 (558, 559)              | 562 (555, 569)       | 0.327        |
|                                             | 164,041                     | 279                  |              |
| Fluid Intelligence, n correct               | 6.0 (6.0, 6.0)              | 5.8 (5.6, 6.1)       | 0.141        |
|                                             | 51,324                      | 84                   |              |
| Numeric memory, n digits remembered         | 6.5 (6.5, 6.5)              | 6.1 (5.7, 6.5)       | 0.083        |
| Completed at Follow-Up                      |                             |                      |              |
|                                             | 116,903                     | 186                  |              |
| Symbol Digit Substitution, n correct        | 19.8 (19.7, 19.8)           | 19.1 (18.4, 19.8)    | 0.083        |
|                                             | 103,270                     | 174                  |              |
| Numeric Trail Making (TMT-A), seconds       | 39.04 (38.95, 39.13)        | 41.63 (39.48, 43.77) | 0.073        |
|                                             | 103,268                     | 174                  |              |
| Alpha-numeric Trail Making (TMT-B), seconds | 66.66 (66.50, 66.82)        | 72.39 (68.79, 75.99) | <b>0.015</b> |
|                                             | 103,268                     | 174                  |              |
| Trail Making Difference, seconds            | 27.62 (27.49, 27.75)        | 30.76 (27.79, 33.74) | 0.083        |

ACHD = adult congenital heart disease; CI = Confidence interval; TMT-A = Numeric Trail Making; TMT-B = Alpha-numeric Trail Making
